# Supplementary material
Source: Springer Nature journal article supplement (https://www.springermedizin.de/resource/supplementary/12967_2011_808_MOESM1_ESM.pdf/9577082)

A

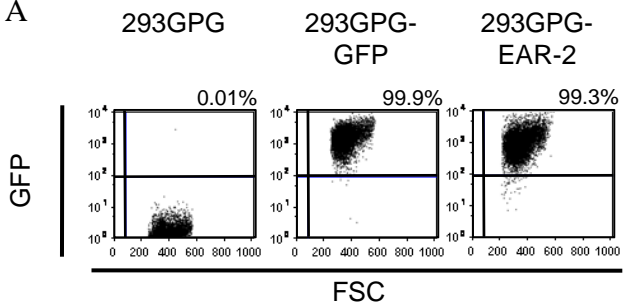

B

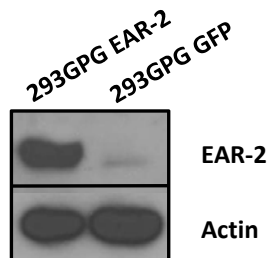

C

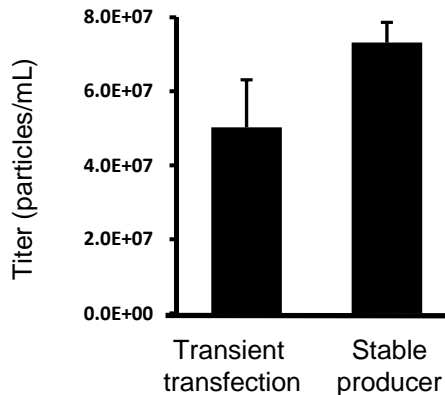

D

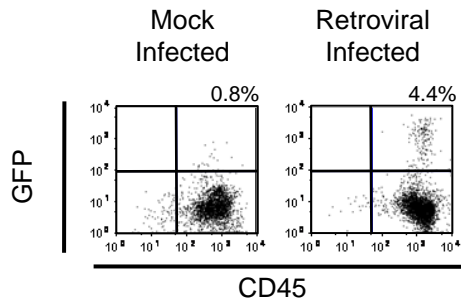

Supplement: MOESM1 [file 9577082]
